# Supplementary material for: The end of a myth—Bt (Cry1Ab) maize does not harm green lacewings
Source: Front Plant Sci. 2014 Aug 12;5:391. doi: 10.3389/fpls.2014.00391 (PMC4129496; doi:10.3389/fpls.2014.00391)
Supplement: Supplementary file 1 [file Table1.XLSX]

## Sheet: Maize
Table S1. Studies conducted to examine the effects of Cry1Ab Bt maize on the abundance of Chrysoperla spp. and Chrysopidae in the field. This includes studies that compared abundance between unsprayed Bt and non-Bt maize and those that compared unsprayed Bt maize to non-Bt maize that had been sprayed to control the pests targeted by Bt. All studies reported more than one independent comparison fr…
Study	Country	Crop	Cry protein	Event	Taxa	Stage	Insecticide	Sampling method	Control sample size	Experimental sample size	Comparison	Control mean	Experimental mean	Control SD	Experimental SD	Citation
1	United States	maize	Cry1Ab	Bt176	Chrysopidae	larva	na	visual whole plant	3	3	non-transgenic control	0.013	0.073	0.012	0.012	Orr DB, Landis DA. Oviposition of European corn borer and impact of natural enemy populations in transgenic versus isogenic corn. Journal of Economic Entomology 1997; 90:905-909.
1	United States	maize	Cry1Ab	Bt176	Chrysopidae	adult	na	visual whole plant	3	3	non-transgenic control	0.007	0.02	0.012	0.02
2	United States	maize	Cry1Ab	Bt176	Chrysopidae	egg	na	visual plant counts	3	3	non-transgenic control	2.7	2.1	2.9698	1.6971	Pilcher CD, Obrycki JJ, Rice ME, Lewis LC. Preimaginal development, survival, and field abundance of insect predators on transgenic Bacillus thuringiensis corn. Environmental Entomology 1997; 26:446-454.
2	United States	maize	Cry1Ab	Bt176	Chrysopidae	larva	na	visual plant counts	3	3	non-transgenic control	0.1	0	0.4243	0
2	United States	maize	Cry1Ab	Bt176	Chrysopidae	adult	na	visual plant counts	3	3	non-transgenic control	0.1	0	0.4243	0
2	United States	maize	Cry1Ab	MON810	Chrysopidae	egg	na	visual plant counts	3	3	non-transgenic control	2.6	3.1	1.6971	2.5456
2	United States	maize	Cry1Ab	MON810	Chrysopidae	larva	na	visual plant counts	3	3	non-transgenic control	0.1	0.1	0.4243	0.4243
2	United States	maize	Cry1Ab	MON810	Chrysopidae	adult	na	visual plant counts	3	3	non-transgenic control	0.1	0.1	0.4243	0.4243
3	United States	maize	Cry1Ab	Bt11	Chrysoperla carnea	adult	na	visual whole plant	4	4	non-transgenic control	0.0833	0	0.1667	0	Wold SJ, Burkness EC, Hutchison WD, Venette RC. In-field monitoring of beneficial insect populations in transgenic corn expressing a Bacillus thuringiensis toxin. Journal of Entomological Science 2001; 36:177-187.
3	United States	maize	Cry1Ab	Bt11	Chrysoperla carnea	larva	na	visual whole plant	4	4	non-transgenic control	0.0833	0	0.1667	0
3	United States	maize	Cry1Ab	Bt11	Chrysoperla carnea	egg	na	visual whole plant	4	4	non-transgenic control	0.1667	0	0.3333	0
3	United States	maize	Cry1Ab	Bt11	Chrysoperla carnea	larva	na	visual whole plant	4	4	non-transgenic control	0	0.0833	0	0.1667
3	United States	maize	Cry1Ab	Bt11	Chrysoperla carnea	egg	na	visual whole plant	4	4	non-transgenic control	0.1667	0.0833	0.1925	0.1667
3	United States	maize	Cry1Ab	Bt11	Chrysoperla carnea	adult	na	visual whole plant	4	4	non-transgenic control	0	0.0417	0	0.0833
3	United States	maize	Cry1Ab	Bt11	Chrysoperla carnea	larva	na	visual whole plant	4	4	non-transgenic control	0.0208	0.0208	0.0417	0.0417
3	United States	maize	Cry1Ab	Bt11	Chrysoperla carnea	egg	na	visual whole plant	4	4	non-transgenic control	0.0208	0.0208	0.0417	0.0417
3	United States	maize	Cry1Ab	Bt11	Chrysoperla carnea	adult	na	visual whole plant	4	4	non-transgenic control	0.0417	0.0417	0.0833	0.0833
3	United States	maize	Cry1Ab	Bt11	Chrysoperla carnea	egg	na	visual whole plant	4	4	non-transgenic control	0.0833	0	0.0962	0
4	France	maize	Cry1Ab	MON810	Chrysoperla carnea	all stages	na	visual whole plant	4	4	non-transgenic control	11.5	12	7.5	2.2	Bourguet D, Chaufaux J, Micoud A, Delos M, Naibo B, Bombarde F et al. Ostrinia nubilalis parasitism and the field abundance of non-target insects in transgenic Bacillus thuringiensis corn (Zea mays). Environmental Biosafety Research 2002; 1:49-60.
4	France	maize	Cry1Ab	MON810	Chrysoperla carnea	all stages	na	visual whole plant	4	4	non-transgenic control	75.5	66.8	12.2	15.1
5	United States	maize	Cry1Ab	Bt11	Chrysoperla carnea	not specified	na	visual whole plant	4	4	non-transgenic control	0.0625	1.3125	0.125	1.0873	Dively, G, Rose, R. Effects of BT transgenic and conventional insecticide control on the non-target natural enemy community in sweet corn. In: Van Driesche RG, editor. Proceedings of the 1st International Symposium on Biological Control of Arthropods, Honolulu, Hawaii, 13-18 January 2002, Morgantown, West Virginia: U.S. Department of Agriculture, Forest Service, Publication FHTET-03-05.; 2003. p.…
5	United States	maize	Cry1Ab	Bt11	Chrysoperla carnea	not specified	lambda-cyhalothrin	visual whole plant	4	4	control w/ insecticides	0.0167	0.7188	0.0645	0.7296
5	United States	maize	Cry1Ab	Bt11	Chrysoperla carnea	not specified	na	visual whole plant	4	4	non-transgenic control	0.6875	2.4688	0.6808	0.4719
5	United States	maize	Cry1Ab	Bt11	Chrysoperla carnea	not specified	lambda-cyhalothrin	visual whole plant	4	4	control w/ insecticides	0.5536	1.3036	0.4454	1.0129
5	United States	maize	Cry1Ab	Bt11	Chrysoperla carnea	not specified	na	visual whole plant	4	4	non-transgenic control	0.5417	0.4792	0.7295	0.5163
5	United States	maize	Cry1Ab	Bt11	Chrysoperla carnea	not specified	lambda-cyhalothrin	visual whole plant	4	4	control w/ insecticides	0.125	0.4792	0.25	0.5163
5	United States	maize	Cry1Ab	Bt11	Chrysoperla carnea	not specified	na	visual whole plant	4	4	non-transgenic control	0.75	0.5125	0.6942	0.5015
5	United States	maize	Cry1Ab	Bt11	Chrysoperla carnea	not specified	lambda-cyhalothrin	visual whole plant	4	4	control w/ insecticides	0.3063	0.5125	0.1835	0.5015
6	France	maize	Cry1Ab	Bt176	Chrysoperla carnea	larvae	na	yellow pan trap	3	3	non-transgenic control	0.55	0.494444	0.245515	0.223814	Candolfi MP, Brown K, Grimm C, Reber B, Schmidli H. A faunistic approach to assess potential side-effects of genetically modified Bt-corn on non-target arthropods under field conditions.Biocontrol Science and Technology 2004; 14:129-170.
6	France	maize	Cry1Ab	Bt176	Chrysoperla carnea	larvae	Bt	yellow pan trap	2	3	control w/ insecticides	0.208333	0.494444	0.0589256	0.223814
6	France	maize	Cry1Ab	Bt176	Chrysoperla carnea	larvae	lambda-cyhalothrin	yellow pan trap	2	3	control w/ insecticides	0.783333	0.494444	0.471405	0.223814
6	France	maize	Cry1Ab	Bt176	Chrysopidae	all stages	na	yellow pan trap	3	3	non-transgenic control	2.92	2.98667	0.538145	1.30496
6	France	maize	Cry1Ab	Bt176	Chrysopidae	all stages	Bt	yellow pan trap	2	3	control w/ insecticides	4.3	2.98667	1.10309	1.30496
6	France	maize	Cry1Ab	Bt176	Chrysopidae	all stages	lambda-cyhalothrin	yellow pan trap	2	3	control w/ insecticides	3.94	2.98667	1.38593	1.30496
7	Italy	maize	Cry1Ab	Bt176	Chrysoperla carnea	larva and adult	na	visual whole plant	5	5	non-transgenic control	2	2	1.6	1.2	Delrio G, Verdinelli M, Serra G. Monitoring of pest and beneficial populations in summer sown Bt maize. IOBC/WPRS Bulletin 2004; 27:43-48.
7	Italy	maize	Cry1Ab	Bt176	Chrysoperla carnea	adult	na	sticky traps	5	5	non-transgenic control	1.2	3.8	0.8	4.2
8	Hungary	maize	Cry1Ab	MON810	Chrysopidae	not specified	na	visual whole plant	6	6	non-transgenic control	2.3333	2	1.5055	0.8944	Toth F, Arpas K, Szekeres D, Kadar F, Szentkiralyi F, Szenasi A et al. Spider web survey or whole plant visual sampling? Impact assessment of Bt corn on non-target predatory insects with two concurrent methods. Environmental Biosafety Research 2004; 3:225-231.
8	Hungary	maize	Cry1Ab	MON810	Chrysopidae	not specified	na	spider-web survey	6	6	non-transgenic control	11.5	9.5	1.6432	4.1352
8	Hungary	maize	Cry1Ab	MON810	Chrysopidae	not specified	na	visual whole plant	6	6	non-transgenic control	6.1667	3.8333	2.5626	1.9408
8	Hungary	maize	Cry1Ab	MON810	Chrysopidae	not specified	na	spider-web survey	6	6	non-transgenic control	3	0.8333	1.5492	1.169
9	Spain	maize	Cry1Ab	Bt176	Chrysopidae	not specified	na	visual whole plant	4	4	non-transgenic control	0.0178	0.0108	0.1696	0	De laPoza M, Pons X, Farinos GP, Lopez C, Ortego F, Eizaguirre M et al. Impact of farm-scale Bt maize on abundance of predatory arthropods in Spain. Crop Protection 2005; 24:677-684.
9	Spain	maize	Cry1Ab	Bt176	Chrysopidae	not specified	na	visual whole plant	4	4	non-transgenic control	0.0108	0.0108	0	0
9	Spain	maize	Cry1Ab	Bt176	Chrysopidae	not specified	na	visual whole plant	4	4	non-transgenic control	0.2016	0.3005	0.3907	0.5676
9	Spain	maize	Cry1Ab	Bt176	Chrysopidae	not specified	na	visual whole plant	3	3	non-transgenic control	0.2865	0.3405	1.1122	1.3188
9	Spain	maize	Cry1Ab	Bt176	Chrysopidae	not specified	na	visual whole plant	3	3	non-transgenic control	0.16	0.0897	0.6117	0.2939
9	Spain	maize	Cry1Ab	Bt176	Chrysopidae	not specified	na	visual whole plant	3	3	non-transgenic control	0.2919	0.2789	1.3188	1.3505
10	United States	maize	Cry1Ab	Bt11	Chrysopidae	egg and larva	na	visual whole plant	3	3	non-transgenic control	0.89	0.7433	0.0529	0.1595	Dively GP. Impact of transgenic VIP3A x Cry1Ab lepidopteran-resistant field corn on the nontarget arthropod community. Environmental Entomology 2005; 34:1267-1291.
10	United States	maize	Cry1Ab	Bt11	Chrysopidae	egg and larva	lambda-cyhalothrin	visual whole plant	3	3	control w/ insecticides	1.2133	0.7433	0.2346	0.1595
10	United States	maize	Cry1Ab	Bt11	Chrysopidae	egg and larva	na	visual whole plant	3	3	non-transgenic control	0.9315	0.7292	0.0052	0.2846
10	United States	maize	Cry1Ab	Bt11	Chrysopidae	egg and larva	lambda-cyhalothrin	visual whole plant	3	3	control w/ insecticides	1.1309	0.7292	0.0646	0.2846
11	United States	maize	Cry1Ab	Bt176	Chrysoperla carnea	adult	na	yellow sticky traps	36	36	non-transgenic control	0.19	0.2	0.18	0.18	Pilcher CD, Rice ME, Obrycki JJ. Impact of transgenic Bacillus thuringiensis corn and crop phenology on five nontarget arthropods. Environmental Entomology 2005; 34:1302-1316.
11	United States	maize	Cry1Ab	Bt176	Chrysoperla carnea	adult	na	yellow sticky traps	36	36	non-transgenic control	0.22	0.17	0.18	0.18
11	United States	maize	Cry1Ab	Bt176	Chrysoperla carnea	adult	na	yellow sticky traps	36	36	non-transgenic control	0.13	0.16	0.12	0.18
11	United States	maize	Cry1Ab	Bt176	Chrysoperla carnea	adult	na	yellow sticky traps	36	36	non-transgenic control	1.1	1.1	0.42	0.54
11	United States	maize	Cry1Ab	Bt176	Chrysoperla carnea	adult	na	yellow sticky traps	36	36	non-transgenic control	1	1.1	0.42	0.48
11	United States	maize	Cry1Ab	Bt176	Chrysoperla carnea	adult	na	yellow sticky traps	36	36	non-transgenic control	1	1	0.42	0.42
11	United States	maize	Cry1Ab	Bt11	Chrysoperla carnea	adult	na	yellow sticky traps	36	36	non-transgenic control	0.06	0.09	0.12	0.12
11	United States	maize	Cry1Ab	Bt11	Chrysoperla carnea	adult	na	yellow sticky traps	36	36	non-transgenic control	0.08	0.09	0.12	0.12
11	United States	maize	Cry1Ab	Bt11	Chrysoperla carnea	adult	na	yellow sticky traps	36	36	non-transgenic control	0.1	0.09	0.12	0.12
11	United States	maize	Cry1Ab	Bt11	Chrysoperla carnea	adult	na	yellow sticky traps	36	36	non-transgenic control	1	1	0.48	0.48
11	United States	maize	Cry1Ab	Bt11	Chrysoperla carnea	adult	na	yellow sticky traps	36	36	non-transgenic control	0.9	0.8	0.42	0.42
11	United States	maize	Cry1Ab	Bt11	Chrysoperla carnea	adult	na	yellow sticky traps	36	36	non-transgenic control	1.1	0.9	0.42	0.48
12	Germany	maize	Cry1Ab	MON810	Chrysopidae	not specified	na	Whole ear	8	8	non-transgenic control	0	0.01	0	0.02	Eckert J, Schuphan I, Hothorn LA, Gathmann A. Arthropods on maize ears for detecting impacts of Bt maize on nontarget organisms. Environmental Entomology 2006; 35:554-560.
12	Germany	maize	Cry1Ab	MON810	Chrysopidae	not specified	na	Whole ear	8	8	non-transgenic control	0.02	0.05	0.03	0.04
12	Germany	maize	Cry1Ab	MON810	Chrysopidae	not specified	cyfluthrin	Whole ear	8	8	control w/ insecticides	0.03	0.01	0.03	0.02
12	Germany	maize	Cry1Ab	MON810	Chrysopidae	not specified	cyfluthrin	Whole ear	8	8	control w/ insecticides	0.03	0.05	0.05	0.04
13	Czech Republic	maize	Cry1Ab	MON810	Chrysoperla carnea	egg	na	visual whole plant	5	5	non-transgenic control	0.324	0.5	0.106207	0.333167	Habuštová O, Doležal P, Spitzer L, Svobodová Z, Hussein H, Sehnal F. Impact of Cry1Ab toxin expression on the non-target insects dwelling on maize plants. Journal of Applied Entomology 2014; 138:164-172.
13	Czech Republic	maize	Cry1Ab	MON810	Chrysoperla carnea	egg	na	visual whole plant	5	5	non-transgenic control	0.83037	0.994336	0.231843	0.321638
13	Czech Republic	maize	Cry1Ab	MON810	Chrysoperla carnea	egg	na	visual whole plant	5	5	non-transgenic control	0.23	0.443333	0.0802773	0.0365148
13	Czech Republic	maize	Cry1Ab	MON810	Chrysoperla carnea	egg	na	visual whole plant	5	5	non-transgenic control	0.118148	0.152963	0.0728298	0.108287
